# Supplementary material for: Short-Term Exposure Effects of the Environmental Endocrine Disruptor Benzo(a)Pyrene on Thyroid Axis Function in Zebrafish
Source: MDPI journal article supplement (doi:10.3390/ijms23105833), 2022-05-23
Supplement: s1 [file s1]

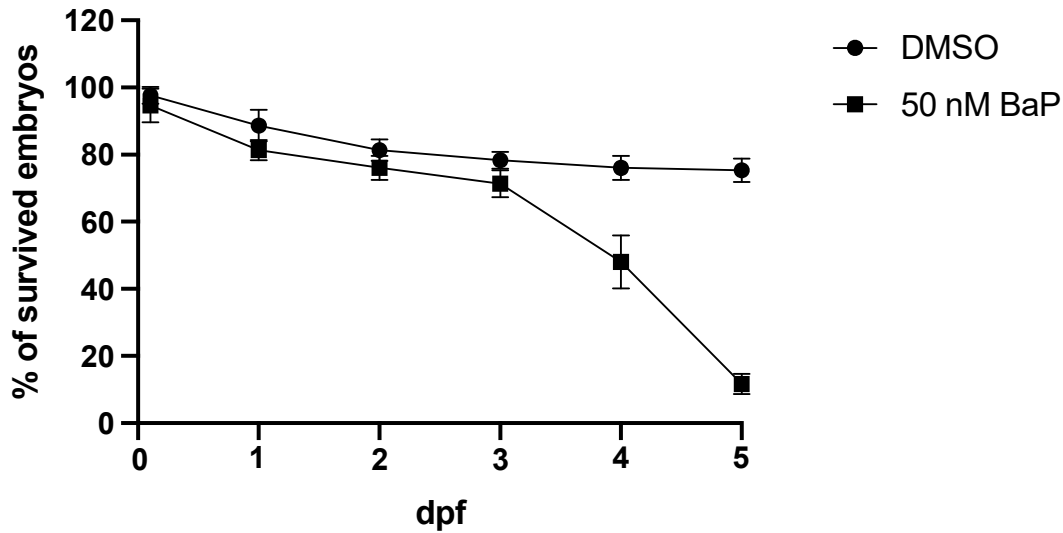

**Supplementary Figure S1:** Survival rates of 1.2% DMSO controls and 50 nM BaP treated zygotes during embryonic development and larval transition at different stages (dpf = days-post fertilization). Results are reported as Mean %  $\pm$  SD of live embryos/larvae derived from three independent experiments, using with at least 150 zygotes each.

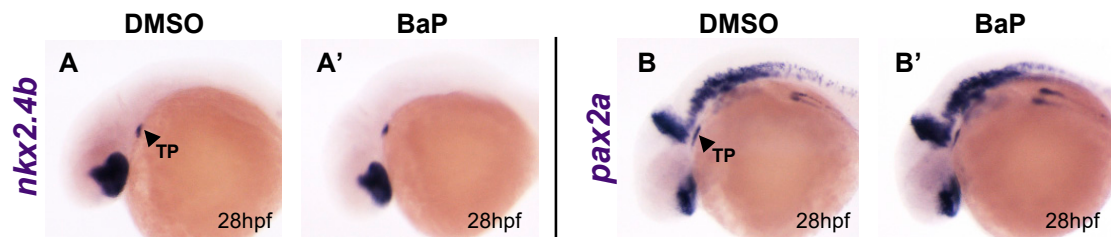

**Supplementary Figure S2:** WISH of *nxk2.4b* (A and A') and *pax2a* (B and B') at the levels of thyroid primordium (TP) of control and BaP treated embryos at 28 hpf. WISH was performed in duplicate using 30 embryos each.
